# Supplementary material for: Brexpiprazole for the Treatment of Agitation in Alzheimer Dementia: A Randomized Clinical Trial
Source: PubMed Central journal article supplement — JAMA Neurol. 2023 Nov 6;80(12):1307–16. doi: 10.1001/jamaneurol.2023.3810 (PMC10628834; doi:10.1001/jamaneurol.2023.3810), 2023-11-06
Supplement: jamaneurol-e233810-s002.pdf [file jamaneurol-e233810-s002.pdf]

## Supplemental Online Content

Lee D, Slomkowski M, Hefting N, et al. Brexpiprazole for the treatment of agitation in Alzheimer dementia: a randomized clinical trial. *JAMA Neurol*. Published online November 6, 2023. doi:10.1001/jamaneurol.2023.3810

**eMethods.** Statistical Analysis

**eReferences**

**eFigure 1.** Study Design

**eFigure 2.** Patient Disposition by Dose

**eFigure 3.** CMAI Total Score and CGI-S Score as Related to Agitation (Efficacy Sample)

**eFigure 4.** Change From Baseline in CMAI Total Score at Week 12 by Subgroup (Efficacy Sample)

**eFigure 5.** Change From Baseline in CMAI Total Score and CGI-S Score as Related to Agitation by Dose (Exploratory Analysis, Efficacy Sample)

**eTable 1.** List of Principal Investigators and Trial Sites

**eTable 2.** CMAI Total Score Sensitivity Analysis – MNAR Using Pattern Mixture Model With Multiple Imputation and Dropout Due to Adverse Event or Withdrawal By Patient as MNAR (Efficacy Sample)

**eTable 3.** Suicidality, EPS, Cognitive Dysfunction, Body Weight, Metabolic Parameters, and QT Interval (Safety Sample)

This supplemental material has been provided by the authors to give readers additional information about their work.

## eMethods. Statistical Analysis

Efficacy was analyzed in the modified intention-to-treat (efficacy) sample, comprising all patients who took at least one dose of study drug and who had a baseline and at least one post-baseline CMAI total score measurement. CMAI total (primary endpoint) and CGI-S (key secondary endpoint) score changes were separately analyzed using MMRM, with change from baseline at each scheduled post-baseline timepoint as the dependent variable. The model for the fixed effects included the following terms: treatment, site, and visit week, an interaction term of treatment by visit week, and the interaction term of baseline score by visit week. The repeated measures across time were treated categorically. An unstructured variance–covariance structure for change from baseline scores among scheduled post-baseline timepoints was used in each MMRM model. The contrast (i.e., least squares mean difference between brexpiprazole and placebo) at the Week 12 visit was estimated from the interaction term and served as the primary treatment comparison. The point estimate and 95% confidence interval estimate of the contrast at Week 12 are reported. The models assumed missing data to be missing at random, with a sensitivity analysis under the missing not at random assumption. Small sites that did not have  $\geq 1$  evaluable patient in each treatment arm (brexpiprazole and placebo) were pooled by region (US, Europe) to form collected sites for the purpose of analysis.

A planned sample size of 330 patients was estimated to achieve 89% power at a two-sided alpha level of 0.05 for detecting a treatment effect of 6.5 points (standard deviation: 16.5) in CMAI total score change from baseline to Week 12, after accounting for early dropouts (12–13% for brexpiprazole in the two prior Phase 3 trials<sup>1</sup>). The target sample size and number of trial sites were increased in protocol amendments to account for the potential impact of the COVID-19 pandemic on patient living situations and clinical outcomes, as well as to compensate for site termination (described below). The treatment effect of 6.5 points was selected to support statistical powering and ensure that the study could be completed within a 4-year timeframe, rather than to represent a threshold for clinical relevance. An interim analysis of efficacy data was performed by an independent data monitoring committee after the first 255 randomized patients had either completed the Week 12 visit or discontinued from the trial. Possible outcomes of the interim analysis were stopping the trial for superiority in efficacy, stopping for futility, or continuing to the final analysis. To control the overall type I error rate at 0.05, a conservative Bonferroni critical boundary was applied, meaning that the significance level was set at 0.015 (two-sided) for the interim analysis, leaving 0.035 (two-sided) for the final analysis, with 87% power. Based on the interim analysis, the committee recommended continuing the trial to the planned sample size (the sponsor remained blinded to the interim results until completion of the trial).

Subgroup analyses of the primary efficacy endpoint were performed by region (US, Europe), sex (female, male), race (White, all other races), age group (<75,  $\geq 75$  years), baseline dementia severity (*post hoc*: mild/moderate, severe), and baseline psychosis status (*post hoc*: present, absent).

Secondary efficacy endpoints of change from baseline in CGI-S score as related to agitation (key secondary), CMAI Factor 1 ‘aggressive behavior’ score (12 items), Factor 2 ‘physically non-aggressive behavior’ score (6 items), and Factor 3 ‘verbally agitated behavior’ score (4 items)<sup>2</sup> were analyzed using equivalent MMRM analyses to the primary analysis. Secondary efficacy endpoints of CGI-I score, CMAI response ( $\geq 20\%$ ,  $\geq 30\%$ ,  $\geq 40\%$  improvement in total score; and improvement in agitation status [i.e., agitated at baseline on any of Factors 1–3, and changing to non-agitated for the same factor, while not becoming agitated on another factor]), and CGI-I response (score of 1 “very much improved” or 2 “much improved”) at Week 12 were analyzed using a last-observation-carried-forward approach with Cochran–Mantel–Haenszel statistics controlling for site. Prespecified exploratory efficacy endpoints included change from baseline in NPI-NH total score, as well as change from baseline in CMAI total score and CGI-S score by dose (brexpiprazole 2 mg versus placebo; brexpiprazole 3 mg versus placebo), which were analyzed using equivalent MMRM analyses to the primary analysis.

The safety sample was composed of all patients who took at least one dose of study drug. Safety results are presented using descriptive statistics.

Two sites were terminated during the trial because good clinical practices were not followed; ongoing patients at these sites were discontinued from the trial. Patient data collected prior to site termination (19 patients) were included in the efficacy and safety analyses.

All analyses were performed using SAS Enterprise Guide version 8.1 (SAS Institute Inc; Cary, NC).

## **eReferences**

1. Grossberg GT, Kohegyi E, Mergel V, et al. Efficacy and safety of brexpiprazole for the treatment of agitation in Alzheimer's dementia: two 12-week, randomized, double-blind, placebo-controlled trials. *Am J Geriatr Psychiatry*. 2020;28(4):383-400. doi:10.1016/j.jagp.2019.09.009
2. Rabinowitz J, Davidson M, De Deyn PP, Katz I, Brodaty H, Cohen-Mansfield J. Factor analysis of the Cohen-Mansfield Agitation Inventory in three large samples of nursing home patients with dementia and behavioral disturbance. *Am J Geriatr Psychiatry*. 2005;13(11):991-998. doi:10.1176/appi.ajgp.13.11.991

## eFigure 1. Study Design

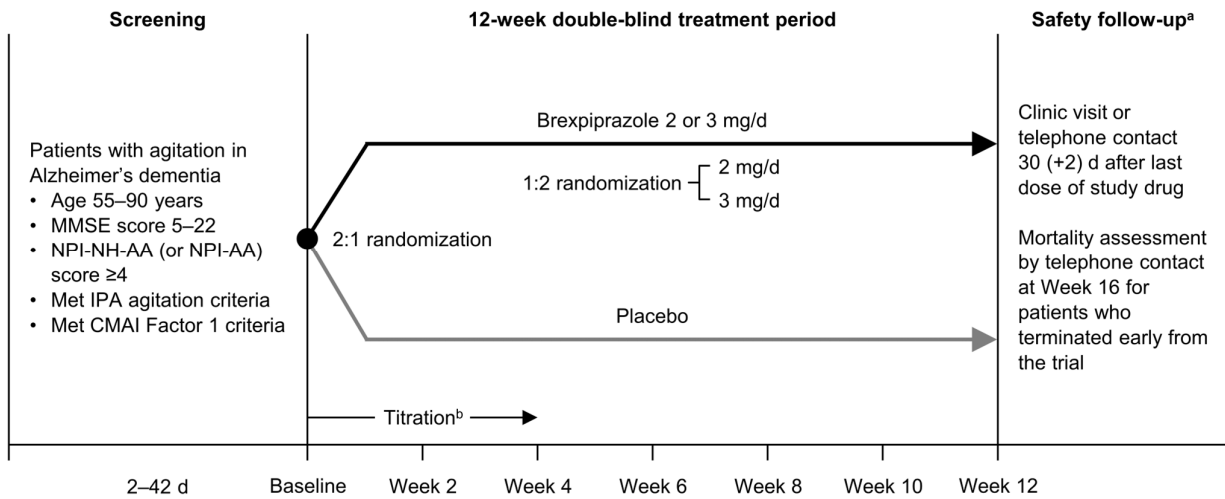

CMAI, Cohen-Mansfield Agitation Inventory; IPA, International Psychogeriatric Association; MMSE, Mini Mental State Examination; NPI-AA, Neuropsychiatric Inventory Agitation/Aggression domain; NPI-NH-AA, Neuropsychiatric Inventory – Nursing Home version Agitation/Aggression domain.

<sup>a</sup>Patients who completed the 12-week double-blind treatment period were offered entry into a 12-week extension trial, as an alternative to the safety follow-up.

<sup>b</sup>First week, 0.5 mg/d; second week, 1 mg/d; third and fourth weeks, 2 mg/d; beyond fourth week, 2 or 3 mg/d (fixed doses).

**eFigure 2. Patient Disposition by Dose**

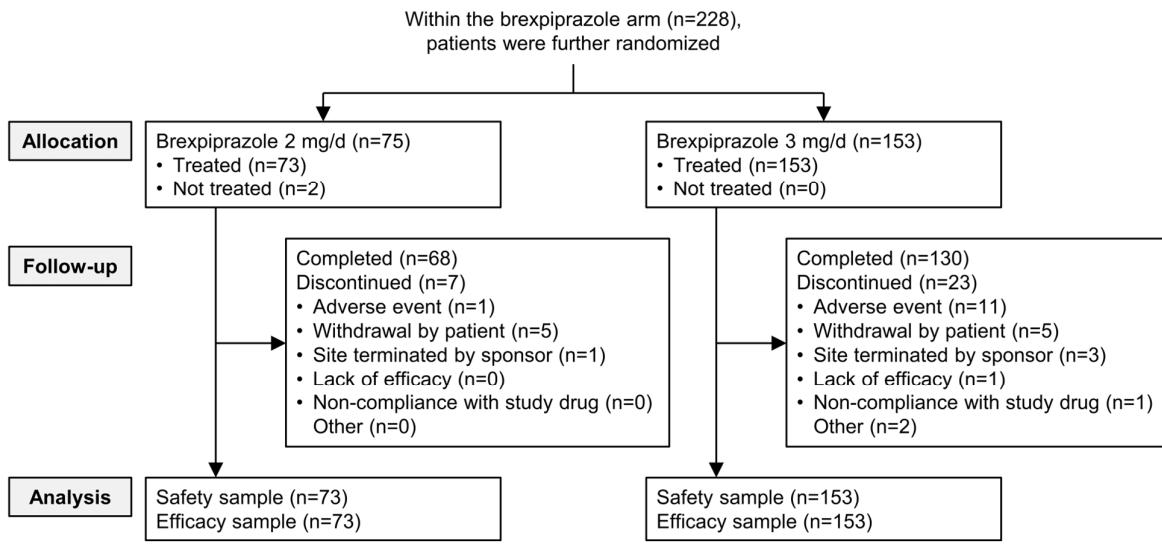

### eFigure 3. CMAI Total Score and CGI-S Score as Related to Agitation (Efficacy Sample)

A. CMAI total score

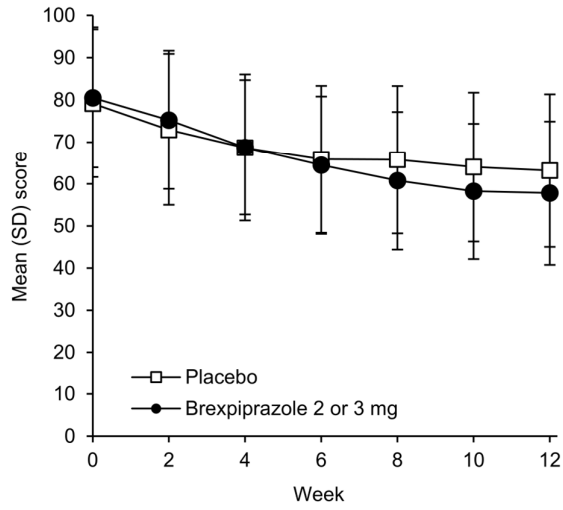

|             |     |     |     |     |     |     |     |
|-------------|-----|-----|-----|-----|-----|-----|-----|
| Placebo, n= | 116 | 114 | 114 | 112 | 105 | 105 | 103 |
| Brex, n=    | 225 | 221 | 216 | 213 | 208 | 198 | 192 |

B. CGI-S score as related to agitation

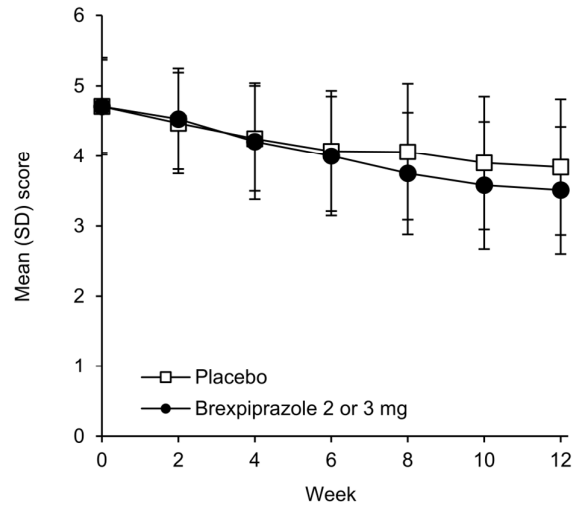

|             |     |     |     |     |     |     |     |
|-------------|-----|-----|-----|-----|-----|-----|-----|
| Placebo, n= | 116 | 114 | 114 | 112 | 105 | 105 | 103 |
| Brex, n=    | 225 | 221 | 215 | 214 | 208 | 199 | 193 |

CGI-S, Clinical Global Impression – Severity of illness; CMAI, Cohen-Mansfield Agitation Inventory; SD, standard deviation.

**eFigure 4. Change From Baseline in CMAI Total Score at Week 12 by Subgroup (Efficacy Sample)**

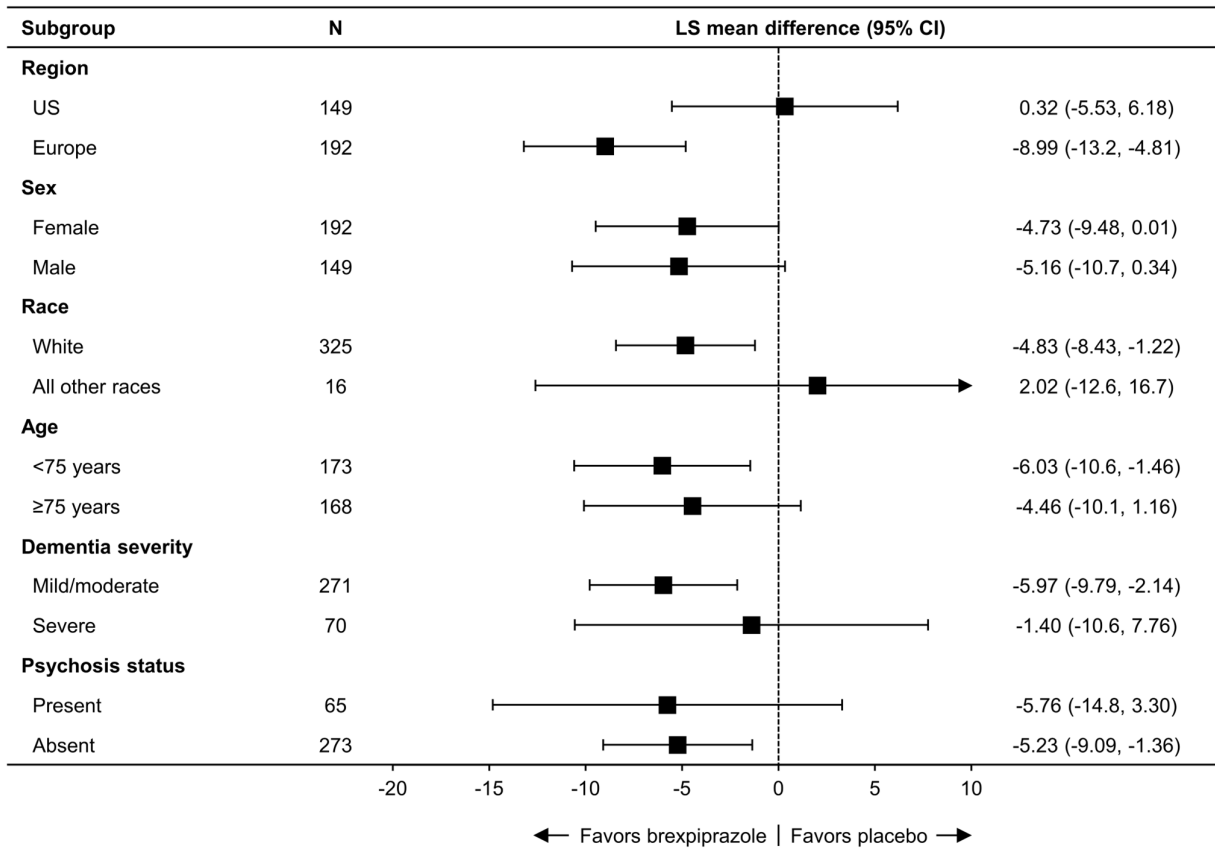

MMRM. In the subgroup analysis by region, the brexpiprazole response was consistent in the US (n=100; LS mean [SE] change, -21.8 [1.7]) and Europe (n=125; LS mean [SE] change, -22.5 [1.3]). However, a numerically higher placebo response was observed in the US (n=49; LS mean [SE] change, -22.1 [2.4]) versus Europe (n=67; LS mean [SE] change, -13.5 [1.7]). In the subgroup analysis by race, the 'all other races' subgroup was too small to be interpretable (n=16). CI, confidence interval; CMAI, Cohen-Mansfield Agitation Inventory; LS, least squares; MMRM, mixed model for repeated measures; SE, standard error.

## eFigure 5. Change From Baseline in CMAI Total Score and CGI-S Score as Related to Agitation by Dose (Exploratory Analysis, Efficacy Sample)

A. CMAI total score by dose (exploratory endpoint)

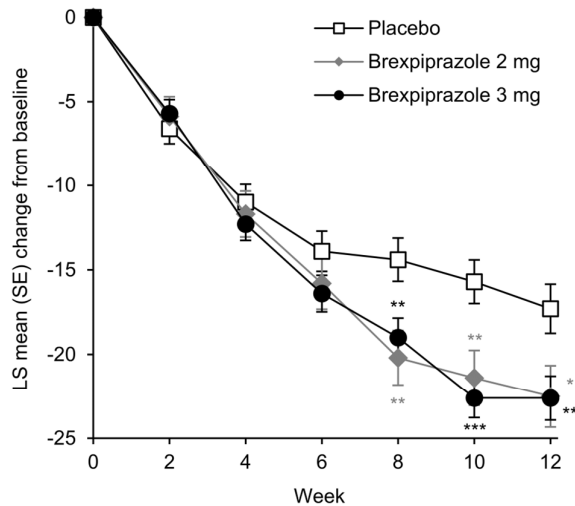

B. CGI-S score as related to agitation by dose (exploratory endpoint)

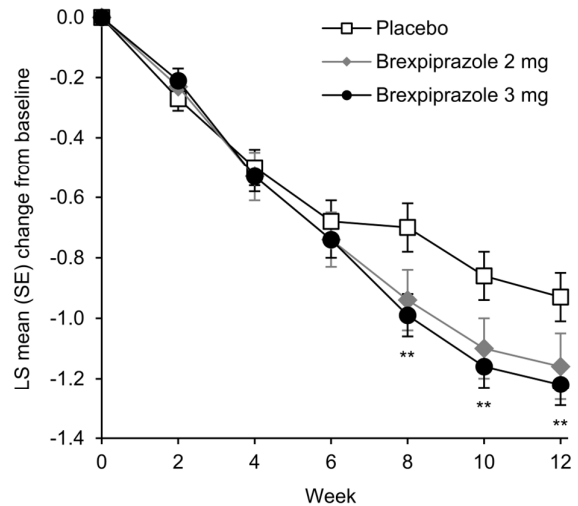

|               |     |     |     |     |     |     |     |               |     |     |     |     |     |     |     |
|---------------|-----|-----|-----|-----|-----|-----|-----|---------------|-----|-----|-----|-----|-----|-----|-----|
| Placebo, n=   | 116 | 114 | 114 | 112 | 105 | 105 | 103 | Placebo, n=   | 116 | 114 | 114 | 112 | 105 | 105 | 103 |
| Brex 2 mg, n= | 73  | 71  | 70  | 70  | 70  | 67  | 66  | Brex 2 mg, n= | 73  | 71  | 69  | 70  | 70  | 67  | 66  |
| Brex 3 mg, n= | 152 | 150 | 146 | 143 | 138 | 131 | 126 | Brex 3 mg, n= | 152 | 150 | 146 | 144 | 138 | 132 | 127 |

Baseline mean CMAI total scores: brexpiprazole 3 mg, 81.3; brexpiprazole 2 mg, 79.1; placebo, 79.2. Baseline mean CGI-S scores: brexpiprazole 3 mg, 4.7; brexpiprazole 2 mg, 4.6; placebo, 4.7. Asterisks indicate nominal *P* values with no adjustment for multiplicity: \**P*<.05, \*\**P*<.01, \*\*\**P*<.001 versus placebo; MMRM. CGI-S, Clinical Global Impression – Severity of illness; CMAI, Cohen-Mansfield Agitation Inventory; LS, least squares; MMRM, mixed model for repeated measures; SE, standard error.



**eTable 1. List of Principal Investigators and Trial Sites**

| Site # | Principal Investigator Name                | Address                                                                                                | # Screened <sup>a</sup> | # Enrolled | # Discontinued |
|--------|--------------------------------------------|--------------------------------------------------------------------------------------------------------|-------------------------|------------|----------------|
| 100    | Rajaprabhakaran Rajarethinam               | Michigan Clinical Research Institute PC<br>3001 Plymouth Road<br>Suite 107<br>Ann Arbor MI 48105<br>US | 2                       | 0          | 0              |
| 101    | Emilio Mantero-Atienza                     | Premier Clinical Research Institute, Inc<br>3100 NW 72nd Avenue<br>Suite 125<br>Miami FL 33122<br>US   | 55                      | 7          | 2              |
| 102    | Hemant Pandey <sup>b</sup>                 | MD First Research, LLC<br>3190 S. Gilbert Road<br>Suite 5<br>Chandler AZ 85286<br>US                   | 18                      | 4          | 0              |
| 103    | Anthony Ciabarra                           | Neurology Center of North Orange County<br>381 E. Imperial Hwy<br>Fullerton CA 92835<br>US             | 1                       | 0          | 0              |
| 104    | Jose Gamez                                 | Galiz Research<br>7100 W 20 Avenue<br>Suite 802<br>Hialeah FL 33016<br>US                              | 23                      | 10         | 0              |
| 105    | Ziad Hawatmeh (Daniel Mandri) <sup>c</sup> | Maxblue Institute Inc.<br>3408 West 84 Street<br>Suite 209<br>Hialeah FL 33018<br>US                   | 11                      | 2          | 0              |
| 106    | Gustavo Alva                               | ATP Clinical Research, Inc.<br>3151 Airway Avenue<br>Ste T-3<br>Costa Mesa CA 92626<br>US              | 6                       | 2          | 0              |
| 107    | Heber Varela                               | Clinovation Research, LLC<br>2700 Glades Circle<br>Suite 142<br>Weston FL 33327<br>US                  | 0                       | 0          | 0              |
| 108    | Malini Nair (Anil Nair) <sup>c</sup>       | Alzheimer Disease Center<br>173 Forest St<br>Winchester MA 01890<br>US                                 | 13                      | 1          | 0              |
| 109    | Michael Pfeffer                            | Allied Biomedical Research Institute<br>7100 SW 47th Street<br>Miami FL 33155<br>US                    | 16                      | 3          | 1              |
| 110    | Richard Weisler                            | Richard H Weisler, MD, PA<br>700 Spring Forest Road<br>Suite 125<br>Raleigh NC 27609<br>US             | 2                       | 0          | 0              |

| Site # | Principal Investigator Name               | Address                                                                                                          | # Screened <sup>a</sup> | # Enrolled | # Discontinued |
|--------|-------------------------------------------|------------------------------------------------------------------------------------------------------------------|-------------------------|------------|----------------|
| 111    | Evelyn Lopez-Brignoni                     | IMIC Inc<br>18320 Franjo Road<br>Palmetto Bay FL 33157<br>US                                                     | 9                       | 1          | 0              |
| 112    | Ashok Patel                               | Bio Behavioral Health<br>20 Hospital Drive<br>Suite 12<br>Toms River NJ 08755<br>US                              | 18                      | 3          | 1              |
| 113    | David Lesch                               | Georgia Neurology and Sleep<br>Medicine Associates<br>4385 Johns Creek Pkwy<br>Ste 230<br>Suwanee GA 30024<br>US | 14                      | 0          | 0              |
| 114    | Gnyandev Patel                            | Shreenath Clinical Service<br>3300 E. South Street<br>Suite 206<br>Lakewood CA 90805<br>US                       | 24                      | 15         | 1              |
| 115    | Dolores Sanchez-Cazau                     | Research in Miami Inc<br>777 East 25 Street<br>Suite 516<br>Hialeah FL 33013<br>US                               | 7                       | 3          | 1              |
| 116    | Emelina Arocha                            | Arocha Research Center<br>2000 SW 27 Avenue<br>Suite 101<br>Miami FL 33145<br>US                                 | 11                      | 2          | 0              |
| 117    | Gil Fernandez-Year                        | Advanced Clinical Research<br>3940 West Flagler Street<br>Coral Gables FL 33134<br>US                            | 9                       | 3          | 0              |
| 118    | Junaid Syed                               | Arch Clinical Trials, LLC<br>1400 Lemay Ferry Road<br>St. Louis MO 63125<br>US                                   | 14                      | 1          | 1              |
| 119    | Joe Pouzar<br>(Amro El Feki) <sup>c</sup> | Centex Studies, Inc.<br>1045 Gemini Avenue<br>Ste. 200-A<br>Houston TX 77058<br>US                               | 9                       | 0          | 0              |
| 122    | Jeanette Wendt                            | Territory Neurology &<br>Research Institute<br>1631 W Ina Road<br>#151<br>Tucson AZ 85704<br>US                  | 0                       | 0          | 0              |
| 123    | Jason Mensah                              | Gadolin Research, LLC<br>2965 Harrison Avenue<br>Suite 317<br>Beaumont TX 77702<br>US                            | 2                       | 0          | 0              |
| 124    | Rodney Guttman                            | University of West Florida<br>(UWF) Clinical Trials<br>8800 N. 9th Avenue<br>Ste. A<br>Pensacola FL 32514<br>US  | 1                       | 0          | 0              |

| Site # | Principal Investigator Name                         | Address                                                                                                 | # Screened <sup>a</sup> | # Enrolled | # Discontinued |
|--------|-----------------------------------------------------|---------------------------------------------------------------------------------------------------------|-------------------------|------------|----------------|
| 125    | Paul Gross                                          | Lehigh Center for Clinical Research<br>401 N 17th Street<br>Suite 207<br>Allentown PA 18104<br>US       | 0                       | 0          | 0              |
| 126    | Syed Zaidi<br>(Ashok Jain, Ata Rehman) <sup>c</sup> | Bio Pharma Informatic Inc.<br>19255 Park Row Drive Suite<br>205<br>Houston, TX 77084<br>US              | 5                       | 0          | 0              |
| 127    | Richard Shubin                                      | SC3 Research<br>50 Alessandro Place<br>Ste 240<br>Pasadena CA 91105<br>US                               | 1                       | 0          | 0              |
| 128    | Francisco Esparza                                   | Nova Clinical Research, LLC<br>2010 59th Street West<br>Suite 3800<br>Bradenton FL 34209<br>US          | 6                       | 0          | 0              |
| 129    | Jason Kellogg                                       | Global Clinical Trials<br>275 Victoria Street<br>Suite 1G<br>Costa Mesa CA 92627<br>US                  | 2                       | 0          | 0              |
| 130    | Joseph Kwentus                                      | Precise Research Centers<br>3531 Lakeland Drive<br>Brentwood Plaza Suite 1060<br>Flowood MS 39232<br>US | 8                       | 0          | 0              |
| 131    | Inna Yuryev-Golger                                  | Integrative Clinical Trials LLC<br>2409 Ocean Avenue<br>Unit # 1F<br>Brooklyn NY 11229<br>US            | 6                       | 3          | 1              |
| 132    | Lydia Hazan                                         | Axis Clinical Trials<br>5800 Wilshire Blvd.<br>Los Angeles CA 90036<br>US                               | 6                       | 0          | 0              |
| 133    | Antonio Terrelonge<br>(Richard Dreize) <sup>c</sup> | Ocean Blue Medical Research<br>286 Westward Drive<br>Miami Springs FL 33166<br>US                       | 2                       | 0          | 0              |
| 134    | Adolfo Cueli                                        | ICR Sites, LLC<br>3901 Nw 79th Avenue<br>Suite 120<br>Doral FL 33166<br>US                              | 18                      | 11         | 6              |
| 135    | Syed Mumtaz                                         | SIH Research<br>724 W Vine Street<br>Kissimmee FL 34741<br>US                                           | 15                      | 8          | 1              |
| 137    | Elly Lee                                            | Irvine Clinical Research<br>2515 McCabe Way<br>Suite 350<br>Irvine CA 92614<br>US                       | 3                       | 0          | 0              |

| Site # | Principal Investigator Name                          | Address                                                                                                  | # Screened <sup>a</sup> | # Enrolled | # Discontinued |
|--------|------------------------------------------------------|----------------------------------------------------------------------------------------------------------|-------------------------|------------|----------------|
| 138    | Richard Holub                                        | Neurological Associates of Albany, PC<br>760 Madison Avenue<br>Albany NY 12208<br>US                     | 7                       | 2          | 0              |
| 139    | Asad Islam                                           | Northpointe Psychiatry<br>860 Hebron Pkwy<br>Suite 1101<br>Lewisville TX 75057<br>US                     | 16                      | 1          | 0              |
| 140    | David Steiner                                        | Five Towns Neurology<br>PC/Village<br>923 Broadway<br>Woodmere NY 11598<br>US                            | 8                       | 0          | 0              |
| 141    | Nader Armanious                                      | California Neurological Services<br>8780 Van Nuys Blvd<br>Suite B.<br>Panorama City CA 91402<br>US       | 3                       | 0          | 0              |
| 142    | Jose Lopez Escobar<br>(Elizabeth Mones) <sup>c</sup> | Health Care Family Rehab & Research<br>5901 NW 183 Street<br>Suite 311<br>Miami FL 33015<br>US           | 62                      | 15         | 0              |
| 143    | Vaughn Whittaker                                     | NY Clinical Trials<br>59 E 54th Street<br>Room 93<br>New York NY 10022<br>US                             | 0                       | 0          | 0              |
| 144    | Manuel Fernandez                                     | Direct Helpers Research Center<br>425 W 51 Place<br>Hialeah FL 33012<br>US                               | 74                      | 9          | 0              |
| 145    | Oscar Hernandez                                      | Janus Clinical Research<br>13500 SW 88th Street<br>Suite 295<br>Miami FL 33186<br>US                     | 0                       | 0          | 0              |
| 146    | Enrique Hanabergh                                    | LC Professional Medical Research Institute<br>5965-5975 SW 8th Street<br>Suite B<br>Miami FL 33144<br>US | 2                       | 1          | 0              |
| 147    | Seema Gupta<br>(Bradley Musser) <sup>c</sup>         | Relaro Medical Trials<br>12801 N. Central Expressway<br>Suite 350<br>Dallas TX 75243<br>US               | 4                       | 1          | 0              |
| 148    | Leonardo Alonso                                      | Central Miami Medical Institute<br>719 NW 13th Avenue<br>Miami FL 33125<br>US                            | 21                      | 3          | 0              |

| Site # | Principal Investigator Name | Address                                                                                                           | # Screened <sup>a</sup> | # Enrolled | # Discontinued |
|--------|-----------------------------|-------------------------------------------------------------------------------------------------------------------|-------------------------|------------|----------------|
| 149    | Shahin Shirzadi             | Mercury Clinical Research Inc.<br>1415 Highway 6,<br>Suite A-200<br>Sugar Land TX 77478<br>US                     | 7                       | 2          | 0              |
| 150    | Jacobo Mintzer              | Roper St. Francis Healthcare<br>316 Calhoun Street<br>Charleston SC 29401<br>US                                   | 9                       | 4          | 1              |
| 151    | Patrick Sciara              | Mariposa Point of<br>Surprise/CCT Research<br>16650 North Stadium Way<br>Surprise AZ 85374<br>US                  | 1                       | 0          | 0              |
| 152    | Sandeep Vaishnavi           | Mind Path Care Centers<br>North Carolina, PLLC<br>1130 Situs Court<br>Suite 190<br>Raleigh NC 27606<br>US         | 3                       | 0          | 0              |
| 154    | Kalvin Kapoor               | Humanity Clinical Research<br>2231 N University Drive<br>Suite B<br>Pembroke Pines FL 33024<br>US                 | 13                      | 3          | 0              |
| 155    | Michael Mahdad              | HB Clinical Trials, Inc.<br>11100 Warner Avenue<br>Suite 150B<br>Fountain Valley CA 92708<br>US                   | 2                       | 0          | 0              |
| 156    | Mohammed Asim Nisar         | Health Synergy Clinical<br>Research<br>308 NW 5th Avenue<br>Suite 125<br>Okeechobee FL 34972<br>US                | 5                       | 1          | 0              |
| 157    | John Puente                 | West Omaha Family<br>Physicians/CCT Research<br>401 East Gold Coast Road<br>Suite 215<br>Papillion NE 68046<br>US | 1                       | 0          | 0              |
| 158    | Jeffrey Shy                 | Neurological Physicians of<br>Arizona<br>726 S Greenfield Road<br>Suite 110<br>Gilbert AZ 85234<br>US             | 0                       | 0          | 0              |
| 159    | Jay Sandberg                | Oakland Medical Research<br>115 E Long Lake Road<br>Troy MI 48085<br>US                                           | 5                       | 1          | 1              |
| 161    | Michael Killpack            | Wasatch Clinical Research,<br>LLC<br>310 East 4500 South<br>Suite 360<br>Salt Lake City UT 84107<br>US            | 0                       | 0          | 0              |

| Site # | Principal Investigator Name | Address                                                                                                        | # Screened <sup>a</sup> | # Enrolled | # Discontinued |
|--------|-----------------------------|----------------------------------------------------------------------------------------------------------------|-------------------------|------------|----------------|
| 162    | Siddharth Kaul              | Clinical Research Professionals<br>17998 Chesterfield Airport Road<br>Suite 100<br>Chesterfield MO 63005<br>US | 3                       | 0          | 0              |
| 163    | Judith Joseph               | Manhattan Behavioral Medicine PPLC<br>2 W 46th Street<br>Ste 405<br>New York NY 10036<br>US                    | 1                       | 0          | 0              |
| 164    | Jose DeLaGandara            | Quantum Laboratories<br>50 E Sample Road<br>Suite 201<br>Pompano Beach FL 33064<br>US                          | 2                       | 0          | 0              |
| 166    | Perminder Bhatia            | Neuro Pain Medical Center<br>736 E Bullard Avenue<br>#101<br>Fresno CA 93710<br>US                             | 6                       | 3          | 0              |
| 168    | Myron Reiff                 | CItrials Inc<br>17800 Woodruff Avenue<br>Suite B<br>Bellflower CA 90706<br>US                                  | 4                       | 0          | 0              |
| 169    | Alfredo Torres              | Clinical Trials of America<br>300 Washington Street<br>Suite 208<br>Monroe LA 71201<br>US                      | 0                       | 0          | 0              |
| 170    | Eric Carbonell              | Combined Research Orlando<br>1417 N Semoran Blvd,<br>Suite 106<br>Orlando FL 32807<br>US                       | 11                      | 1          | 0              |
| 172    | Silvia Silva-Duluc          | South Florida Research Phase I-IV, Inc.<br>4487 NW 36th Street<br>Miami Springs FL 33166<br>US                 | 10                      | 5          | 1              |
| 174    | Hareesh Boghara             | Epic Medical Research<br>106 Plaza Drive<br>Red Oak TX 75154<br>US                                             | 3                       | 0          | 0              |
| 175    | Zaheer Aslam                | Gulfcoast Clinical Research Center<br>6150 Diamond Centre Ct<br>Building 500<br>Fort Myers FL 33912<br>US      | 0                       | 0          | 0              |
| 176    | Lourdes Selem               | New Life Medical Research Center, Inc.<br>3750 W 16th Avenue<br>Suite 226 U<br>Hialeah FL 33012<br>US          | 11                      | 7          | 0              |

| Site # | Principal Investigator Name                   | Address                                                                                                   | # Screened <sup>a</sup> | # Enrolled | # Discontinued |
|--------|-----------------------------------------------|-----------------------------------------------------------------------------------------------------------|-------------------------|------------|----------------|
| 177    | Tatiana Hernandez                             | Bayside Medical Group<br>2155 Little Road<br>Trinity FL 34655<br>US                                       | 6                       | 1          | 0              |
| 178    | Ibrahim Menendez-Perez                        | Project4Research, Inc.<br>1281 NW 6 Street<br>Miami FL 33125<br>US                                        | 10                      | 4          | 0              |
| 179    | David Purselle                                | Advanced Discovery Research<br>652 Bellemeade Avenue NW<br>Atlanta GA 30318<br>US                         | 2                       | 1          | 0              |
| 180    | Luis Merced                                   | VICIS Clinical Research<br>6107 Memorial Highway<br>Suite G<br>Tampa FL 33615<br>US                       | 4                       | 2          | 0              |
| 181    | John De Beixedon                              | Havana Research Institute LLC<br>675 S. Arroyo Parkway<br>Suite 320<br>Pasadena CA 91105<br>US            | 0                       | 0          | 0              |
| 182    | Cyrus Khorrami                                | Ocean Medical Research<br>328 Commons Way,<br>Bldg. C<br>Toms River NJ 08755<br>US                        | 0                       | 0          | 0              |
| 184    | Mark DiBuono<br>(Eli Shalenberg) <sup>c</sup> | Evolution Research Group<br>4349 Hylan Blvd<br>Staten Island NY 10312<br>US                               | 2                       | 1          | 1              |
| 185    | Miguel Flores                                 | International Research<br>Associates, LLC<br>8200 SW 117th Avenue<br># 210<br>Miami FL 33183<br>US        | 0                       | 0          | 0              |
| 186    | Rafael Gonzalez                               | P&S Research, LLC<br>12905 SW 42 Street<br>Ste: 201<br>Miami FL 33175<br>US                               | 2                       | 0          | 0              |
| 188    | Karen Figueredo<br>Reyes                      | Innovation Medical Research<br>Center<br>9299 SW 152nd Street<br>Suite 205<br>Palmetto Bay FL 33157<br>US | 11                      | 5          | 1              |
| 189    | Alan Jacobson                                 | Miami Health Center<br>19001 SW 106 Avenue<br>Suite C-109<br>Cutler Bay FL 33157<br>US                    | 0                       | 0          | 0              |
| 190    | Brad Herskowitz                               | Brainstorm Research<br>9090 SW 87th Court<br>Suite 200<br>Miami FL 33176<br>US                            | 2                       | 0          | 0              |

| Site # | Principal Investigator Name  | Address                                                                                                                                                                                 | # Screened <sup>a</sup> | # Enrolled | # Discontinued |
|--------|------------------------------|-----------------------------------------------------------------------------------------------------------------------------------------------------------------------------------------|-------------------------|------------|----------------|
| 200    | Veselin Palazov              | Mental Health Center<br>Prof. Dr Ivan Temkov – Burgas<br>EOOD<br>Department for Treatment of<br>Emergency Psychiatric<br>Conditions<br>Complex Lazur<br>Park Ezero<br>Burgas 8000<br>BG | 5                       | 4          | 0              |
| 201    | Temenuzhka Dechkova-Novakova | Mental Health Centre-Ruse<br>EOOD, Daily Unit<br>20 Tutrakan Blvd.<br>Ruse 7003<br>BG                                                                                                   | 10                      | 7          | 1              |
| 202    | Hristo Kozhuharov            | Diagnostic and Consultative<br>Centre Mladost – M Varna<br>OOD<br>Unit V, Office 521<br>15 “Republika” Blvd.<br>Varna 9020<br>BG                                                        | 7                       | 6          | 0              |
| 203    | Rozaliya Rangelova           | State Psychiatry Hospital –<br>Kardzhali<br>Third Male Department,<br>44 Dobrich Str.<br>Kardzhali 6600<br>BG                                                                           | 6                       | 3          | 2              |
| 204    | Petar Petrov                 | Diagnostic and Consultative<br>Centre Mladost – M Varna<br>OOD<br>Unit G, Office 312<br>15 “Republika” Blvd<br>Varna 9020<br>BG                                                         | 5                       | 5          | 0              |
| 205    | Nadya Ivanova                | Mental Health Center – Vratsa<br>EOOD<br>Department of Psychiatry,<br>1 Belasitsa Str.<br>Vratza Vratza 3000<br>BG                                                                      | 11                      | 7          | 0              |
| 206    | Assen Karadaliiev            | Medical Center Sveti Naum<br>EOOD Izgrev district,<br>1 Lyuben Rusev Str.<br>Sofia 1113<br>BG                                                                                           | 11                      | 2          | 0              |
| 208    | Toni Donchev                 | Medical Center Intermedica<br>OOD 62 Nishava Str.<br>Sofia 1680<br>BG                                                                                                                   | 8                       | 3          | 0              |
| 300    | Angel Luis Montejo-Gonzalez  | Centro de Salud San Juan<br>First Floor<br>Unidad de Investigación<br>Neurociencias<br>Avenida de Portugal, 83<br>Salamanca 37005<br>ES                                                 | 3                       | 2          | 1              |



| Site # | Principal Investigator Name | Address                                                                                                                                                                                                                                                                                          | # Screened <sup>a</sup> | # Enrolled | # Discontinued |
|--------|-----------------------------|--------------------------------------------------------------------------------------------------------------------------------------------------------------------------------------------------------------------------------------------------------------------------------------------------|-------------------------|------------|----------------|
| 301    | Manuel Franco Martin        | Complejo Asistencial de Zamora. Servicio de Psiquiatria<br>C Hernan Cortes 40<br>Zamora 49021<br>ES                                                                                                                                                                                              | 9                       | 3          | 0              |
| 302    | Juan Luis Munoz Sanchez     | Hospital Universitario Rio Hortega<br>Servicio de Psiquiatria<br>C Dulzaina 2<br>Valladolid 47012<br>ES                                                                                                                                                                                          | 12                      | 6          | 2              |
| 303    | Miguel Baquero Toledo       | Hospital Universitari i Politecnic La Fe<br>Service de Neurologia<br>Avda Fernando Abril Martorell 109<br>Torre C, Planta 5<br>Valencia 46026<br>ES                                                                                                                                              | 0                       | 0          | 0              |
| 304    | Jose Miguel Lainez Andres   | Hospital Clinico Universitario de Valencia<br>Blasco Ibañez, 17<br>Valencia 46010<br>ES                                                                                                                                                                                                          | 0                       | 0          | 0              |
| 400    | Valentyna Kozydubova        | Public Non-profit Enterprise within Kharkiv Regional Council Regional Clinical Psychiatric Hospital No. 3, #14 psychiatric department for adults<br>46, Acad. Pavlov Vul<br>Kharkiv 61068<br>UA                                                                                                  | 21                      | 14         | 4              |
| 401    | Svitlana Moroz              | Communal Company "Dnipropetrovsk Regional Clinical Hospital named after I.I. Mechnikov" Dnipropetrovsk Regional Council<br>14, Ploscha Soborna<br>Dnipro 49005<br>UA                                                                                                                             | 10                      | 9          | 0              |
| 402    | Andrii Skrypnikov           | Communal Enterprise "Regional Institution of Mental Psychiatric Care of the Poltava Regional Council".<br>Higher State Educational Establishment of Ukraine "Ukrainian Medical and Dental Academy", Chair of Psychiatry, Narcology and Medical Psychology 1, Medychna St.<br>Poltava 36013<br>UA | 21                      | 17         | 0              |
| 403    | Iryna Vrublevska            | Kiev City Psychoneurological hospital # 3, Department of nursing care #6<br>7 Pavlova Str.<br>Glevakha Kiev region 08631<br>UA                                                                                                                                                                   | 9                       | 9          | 0              |

| Site # | Principal Investigator Name | Address                                                                                                                                                                                                                                                                                                                                                                                         | # Screened <sup>a</sup> | # Enrolled | # Discontinued |
|--------|-----------------------------|-------------------------------------------------------------------------------------------------------------------------------------------------------------------------------------------------------------------------------------------------------------------------------------------------------------------------------------------------------------------------------------------------|-------------------------|------------|----------------|
| 404    | Kateryna Zakal              | Communal Institution of Lviv Regional Council "Lviv Regional Clinical Psychiatric Hospital", Department #20<br>95 Kulparkivska str.<br>Lviv 79021<br>UA                                                                                                                                                                                                                                         | 15                      | 10         | 2              |
| 405    | Pavlo Palamarchuk           | Public nonprofit enterprise "Kherson Regional Institution of Mental Care" of Kherson Regional Council, Male Psychiatric Department #3 and Female Psychiatric Department #10<br>65, Govarda Vul.<br>Kherson Kherson 73488<br>UA                                                                                                                                                                  | 29                      | 19         | 3              |
| 406    | Oksana Serebrennikova       | Communal Noncommercial Enterprise "Vinnytsia Regional Clinical Psychoneurological Hospital" named after Acad. O. I. Yushchenko of Vinnytsia regional Council<br>Male Department #14, Female Department #15, M.I. Pirogov<br>Vinnytsia National Medical University, Chair of Psychiatry, Narcology and Psychotherapy with Postgraduate Studies Course<br>109 Pyrogov St<br>Vinnytsia 21005<br>UA | 18                      | 12         | 0              |
| 407    | Andriy Dubenko              | Public Non-profit Enterprise within Kharkiv Regional Council Regional Clinical Psychiatric Hospital No. 3, #23 psychiatric department for war veterans 46, Acad. Pavlov Vul.<br>Kharkiv 61068<br>UA                                                                                                                                                                                             | 11                      | 9          | 1              |
| 408    | Yuliya Blazhevych           | Municipal uncommercial enterprise "Clinical Hospital" PSYCHIATRY of the executive agency of the Kyiv city council (Kyiv city state administration), Center for Novel Treatment and Rehabilitation of Psychotic disorders<br>Department 29 (Men's),<br>Department 30 (Women's),<br>Outpatient Clinic Office of Department 30<br>103 Kyrulivska str.<br>Kyiv, Kyiv Region 04080<br>UA             | 9                       | 8          | 1              |

| Site # | Principal Investigator Name | Address                                                                                                                                                                                                                                         | # Screened <sup>a</sup> | # Enrolled | # Discontinued |
|--------|-----------------------------|-------------------------------------------------------------------------------------------------------------------------------------------------------------------------------------------------------------------------------------------------|-------------------------|------------|----------------|
| 409    | Valerii Pidkorytov          | State Institution "Institute of Neurology, Psychiatry and Narcology of the National Academy of Medical Sciences of Ukraine", Clinic of Department of Clinical, Social and Pediatric Psychiatry<br>46, Acad. Pavlova Vul.<br>Kharkiv 61068<br>UA | 0                       | 0          | 0              |
| 500    | Vladimir Diligenski         | Clinical Hospital Center "Dr. Dragisa Misovic - Dedinje"<br>Clinic of Psychiatry,<br>Heroja Milana Tepica 1<br>Belgrade 11000<br>RS                                                                                                             | 8                       | 7          | 0              |
| 501    | Vladimir Janjic             | Clinical Center Kragujevac<br>Clinic of Psychiatry,<br>Zmaj Jovina 30<br>Kragujevac 34000<br>RS                                                                                                                                                 | 4                       | 1          | 0              |
| 502    | Jovanka Petrovic            | Special Hospital for Psychiatric Diseases "Kovin"<br>Cara Lazara 253<br>Kovin 26220<br>RS                                                                                                                                                       | 17                      | 11         | 1              |
| 503    | Marija Semnic               | Clinical Center of Vojvodina<br>Clinic of Neurology,<br>Hajduk Veljkova 1-9<br>Novi Sad 21000<br>RS                                                                                                                                             | 2                       | 0          | 0              |
| 504    | Vrsac<br>Voskresenski       | Special Hospital for Psychiatric Diseases "Dr Slavoljub Bakalovic" Vrsac<br>Podvrsanska 13<br>Vrsac 26300<br>RS                                                                                                                                 | 0                       | 0          | 0              |
| 700    | Magdolna<br>Abraham         | Bekes Megyei Kozponti Korhaz<br>Pzichiatra<br>Simmelweis utca 1.<br>Gyula 5700<br>HU                                                                                                                                                            | 0                       | 0          | 0              |
| 701    | Gabor Feller                | Petz Aladar County Teaching Hospital<br>Department of Psychiatry<br>Mental Hygiene and<br>Addictology Vasvari P. str. 2-4.<br>Gyor 9024<br>HU                                                                                                   | 2                       | 0          | 0              |
| 703    | Agnes Kertesz               | Balassa Janos Hospital<br>Psychiatry Beri Balogh A. u.<br>5-7.<br>Szekszard 7100<br>HU                                                                                                                                                          | 2                       | 0          | 0              |
| 704    | Eva Mathé                   | Dr. Mathe es Tarsa Bt<br>Szechenyi str 8.<br>Kalocsa 6300<br>HU                                                                                                                                                                                 | 6                       | 3          | 0              |

| Site # | Principal Investigator Name                  | Address                                                                                                                 | # Screened <sup>a</sup> | # Enrolled | # Discontinued |
|--------|----------------------------------------------|-------------------------------------------------------------------------------------------------------------------------|-------------------------|------------|----------------|
| 706    | Magdolna Pakaski (Kalman Janos) <sup>c</sup> | Szegedi Tudományegyetem AOK, Pszichiatriai Klinika, Vasas Szent Peter u. 1-3. Szeged 6724 HU                            | 0                       | 0          | 0              |
| 707    | Viktor Voros                                 | PsychoTech Kft. 2/2. Endresz Gyorgy str. Pecs 7633 HU                                                                   | 6                       | 1          | 0              |
| 708    | Janos Rethelyi                               | Semmelweis University Medical School, Department of Psychiatry and Psychotherapy Balassa Janos utca 6. Budapest 1083 HU | 3                       | 2          | 0              |
| 709    | Tibor Kovacs                                 | Semmelweis University Medical School, Department of Neurology Balassa Janos utca 6. Budapest 1083 HU                    | 1                       | 0          | 0              |
| 800    | Beata Dupejova                               | Neurologicka Ambulancia MUDr.Dupejova Nová 21 Banská Bystrica 974 04 SK                                                 | 11                      | 5          | 1              |
| 801    | Eva Palova                                   | EPAMED s.r.o. Department of Psychiatry - Outpatient Unit, Topasova 9, Hlavná 68 Kosice 040 11 SK                        | 10                      | 2          | 0              |
| 802    | Martina Hanzelova                            | KRANKAS s.r.o. Vojtecha Spanyola 43 Zilina 012 07 SK                                                                    | 0                       | 0          | 0              |
| 804    | Peter Molcan                                 | Mentum s.r.o. Ruzinovska 10 Bratislava 820 07 SK                                                                        | 1                       | 0          | 0              |
| 805    | Magdalena Perichtova                         | Medicinske Centrum Konzilium s.r.o. - Dubnica nad Vahom Andreja Kmeťa 370 Dubnica nad Váhom 018 41 SK                   | 10                      | 6          | 4              |
| 806    | Veronika Reznakova                           | Centrum MEMORY n.o Mlynarovicova 2571/21 Bratislava 851 01 SK                                                           | 3                       | 0          | 0              |
| 807    | Livia Vavrusova                              | Psychiatricka ambulancia - Vavrusova Consulting, s.r.o Zaporozská 12 Bratislava 851 01 SK                               | 1                       | 0          | 0              |

<sup>a</sup>A total of 900 unique patients were screened (987 screenings; 87 patients were rescreened).

<sup>b</sup>Coordinating investigator.

<sup>c</sup>Former principal investigator.

**eTable 2. CMAI Total Score Sensitivity Analysis – MNAR Using Pattern Mixture Model With Multiple Imputation and Dropout Due to Adverse Event or Withdrawal By Patient as MNAR (Efficacy Sample)**

| Shifted from the MAR <sup>a</sup> | Treatment difference versus placebo |                      |
|-----------------------------------|-------------------------------------|----------------------|
|                                   | Difference (95% CI) <sup>b</sup>    | P value <sup>b</sup> |
| 0                                 | -4.79 (-8.16, -1.41)                | .005                 |
| 0.65                              | -4.73 (-8.11, -1.36)                | .006                 |
| 1.3                               | -4.68 (-8.06, -1.31)                | .007                 |
| 1.95                              | -4.63 (-8.01, -1.25)                | .007                 |
| 2.6                               | -4.58 (-7.96, -1.20)                | .008                 |
| 3.25                              | -4.53 (-7.92, -1.15)                | .009                 |
| 3.9                               | -4.48 (-7.87, -1.10)                | .01                  |
| 4.55                              | -4.43 (-7.82, -1.04)                | .01                  |
| 5.2                               | -4.38 (-7.77, -0.99)                | .01                  |
| 5.85                              | -4.33 (-7.73, -0.93)                | .01                  |
| 6.5                               | -4.28 (-7.68, -0.88)                | .01                  |
| 7.15                              | -4.23 (-7.63, -0.82)                | .01                  |
| 7.8                               | -4.18 (-7.59, -0.77)                | .02                  |
| 8.45                              | -4.13 (-7.54, -0.71)                | .02                  |
| 9.1                               | -4.08 (-7.50, -0.66)                | .02                  |
| 9.75                              | -4.03 (-7.45, -0.60)                | .02                  |
| 10.4                              | -3.98 (-7.41, -0.54)                | .02                  |
| 11.05                             | -3.93 (-7.36, -0.49)                | .03                  |
| 11.7                              | -3.87 (-7.32, -0.43)                | .03                  |
| 12.35                             | -3.82 (-7.28, -0.37)                | .03                  |
| 13                                | -3.77 (-7.23, -0.31)                | .03                  |
| 13.65                             | -3.72 (-7.19, -0.26)                | .04                  |
| 14.3                              | -3.67 (-7.15, -0.20)                | .04                  |
| 14.95                             | -3.62 (-7.10, -0.14)                | .04                  |
| 15.6                              | -3.57 (-7.06, -0.08)                | .05                  |
| 16.25                             | -3.52 (-7.02, -0.02)                | .05                  |
| 16.9                              | -3.47 (-6.98, 0.04)                 | .05                  |

Abbreviations: CI, confidence interval; CMAI, Cohen-Mansfield Agitation Inventory; MAR, missing at random; MNAR, missing not at random.

<sup>a</sup>Analysis departs from MAR assumption by progressively increasing the delta (treatment effect) until the conclusion from the primary analysis is overturned. When delta is 0 the missing data are assumed to be MAR; when delta is >0 the missing data are assumed to be MNAR.

<sup>b</sup>Derived based on 100 imputations.

**eTable 3. Suicidality, EPS, Cognitive Dysfunction, Body Weight, Metabolic Parameters, and QT Interval (Safety Sample)**

| Endpoint                                          | Placebo       | Brexiprazole<br>2 or 3 mg | Treatment difference versus placebo |         |
|---------------------------------------------------|---------------|---------------------------|-------------------------------------|---------|
|                                                   |               |                           | LS mean difference (95% CI)         | P value |
| <b>LS mean change from baseline to last visit</b> |               |                           |                                     |         |
| Sheehan-STS total score <sup>a</sup>              | -0.01 (n=110) | -0.02 (n=214)             | 0.00 (-0.03 to 0.03)                | .83     |
| SAS total score <sup>a</sup>                      | 0.07 (n=109)  | 0.47 (n=211)              | 0.40 (0.09 to 0.71)                 | .01     |
| AIMS Movement rating score <sup>a</sup>           | 0.05 (n=110)  | 0.05 (n=212)              | 0.00 (-0.08 to 0.08)                | >.99    |
| BARS Global score <sup>a</sup>                    | -0.04 (n=110) | -0.04 (n=213)             | 0.00 (-0.04 to 0.04)                | .96     |
| MMSE score <sup>a</sup>                           | 0.31 (n=110)  | 0.30 (n=212)              | -0.01 (-0.59 to 0.56)               | .97     |
| Body weight, kg <sup>b</sup>                      | -0.03 (n=111) | 0.18 (n=220)              | 0.22 (-0.35 to 0.79)                | .45     |
| <b>Mean change from baseline to last visit</b>    |               |                           |                                     |         |
| Fasting metabolic parameters, mg/dL               |               |                           |                                     |         |
| Glucose                                           | -2.29 (n=108) | 5.64 (n=196)              | –                                   | –       |
| HDL cholesterol                                   | -1.21 (n=107) | -0.64 (n=196)             | –                                   | –       |
| LDL cholesterol                                   | 3.16 (n=105)  | -0.84 (n=193)             | –                                   | –       |
| Total cholesterol                                 | 2.84 (n=107)  | -2.08 (n=196)             | –                                   | –       |
| Triglycerides                                     | 10.69 (n=107) | -1.53 (n=196)             | –                                   | –       |
| QTcF, ms                                          | 0.3 (n=112)   | 1.3 (n=221)               | –                                   | –       |
| QTcF prolongation, No. (%) <sup>c</sup>           | 3/112 (2.7)   | 3/221 (1.4)               | –                                   | –       |

Abbreviations: ANCOVA, analysis of covariance; AIMS, Abnormal Involuntary Movement Scale; BARS, Barnes Akathisia Rating Scale; CI, confidence interval; EPS, extrapyramidal symptoms; HDL, high-density lipoprotein; LDL, low-density lipoprotein; LS, least squares; MMSE, Mini Mental State Examination; QTcF, QT interval as corrected by Fridericia's formula; SAS, Simpson–Angus Scale; STS, Suicidality Tracking Scale.

<sup>a</sup>ANCOVA model, with treatment and trial site as main effects and baseline value as covariate.

<sup>b</sup>ANCOVA model, with treatment as main effect and baseline value as covariate.

<sup>c</sup>New onset, ≥450 ms (men), ≥470 ms (women), at any post-baseline visit.
