# Supplementary material for: Brexpiprazole for the Treatment of Agitation in Alzheimer Dementia: A Randomized Clinical Trial
Source: PubMed Central journal article supplement — JAMA Neurol. 2023 Nov 6;80(12):1307–16. doi: 10.1001/jamaneurol.2023.3810 (PMC10628834; doi:10.1001/jamaneurol.2023.3810), 2023-11-06
Supplement: jamaneurol-e233810-s003.pdf [file jamaneurol-e233810-s003.pdf]

## Data Sharing Statement

Lee. Brexpiprazole for the Treatment of Agitation in Alzheimer Dementia. *JAMA Neurol.*  
Published November 06, 2023. doi:10.1001/jamaneurol.2023.3810

### Data

**Data available:** Yes

**Data types:** Deidentified participant data

**How to access data:** Requests for trial data can be submitted at the Otsuka Pharmaceutical Clinical Trial Data Transparency website (<https://clinical-trials.otsuka.com/>).

**When available:** With publication

### Supporting Documents

**Document types:** None

### Additional Information

**Who can access the data:** Requests from anyone for deidentified, aggregated data will be honored whenever possible. Requests for the clinical study report, analytical code, and anonymized individual participant data will be considered for researchers who provide a methodologically sound proposal for use of this information.

**Types of analyses:** ANY PURPOSES

**Mechanisms of data availability:** SIGNED DATA ACCESS AGREEMENT
